# Supplementary material for: Detection of latent forms of Mycobacterium avium subsp. paratuberculosis infection using host biomarker-based ELISAs greatly improves paratuberculosis diagnostic sensitivity
Source: PubMed Central journal article supplement (PMC7470414; doi:10.1371/journal.pone.0236336), 2020-09-03
Supplement: pone.0236336.s001.pdf [file pone.0236336.s001.pdf]

| ID  | FARM   | HISTOPATHOLOGICAL GROUP | ZN  | INFECTION STATUS | ELISA FAM84A | ELISA DES | ELISA ABCA13 | ELISA MMP8 | ELISA SPARC | ELISA IDEXX | ELISA IDEXX (numerical value) | PCR FECES | PCR TISSUES | CULTURE FECES | CULTURE TISSUES | AGE (YEARS)  | CLINICAL SIGNS |
|-----|--------|-------------------------|-----|------------------|--------------|-----------|--------------|------------|-------------|-------------|-------------------------------|-----------|-------------|---------------|-----------------|--------------|----------------|
| 1   | Noreña | FOCAL                   | POS | +                | Infected     | 2,24      | 26,66        | 8,03       | 182,63      | 180,72      | NEG                           | 10,94     | NEG         | NEG           | POS             | NEG          | 6,58 UNKNOWN   |
| 2   | Noreña | FOCAL                   | POS | +                | Infected     | 1,71      | 38,25        | 3,85       | 111,72      | 1184,43     | NEG                           | 4,09      | NEG         | NEG           | NEG             | NEG          | 3,95 UNKNOWN   |
| 3   | Noreña | FOCAL                   | POS | +                | Infected     | 1,23      | 25,32        | 9,96       | 173,57      | 497,44      | NEG                           | 17,30     | NEG         | NEG           | NEG             | NEG          | 4,26 UNKNOWN   |
| 5   | Noreña | FOCAL                   | NEG |                  | Infected     | 2,16      | 43,96        | 7,42       | 995,85      | 2856,27     | POS                           | 157,76    | NEG         | NEG           | NEG             | POS          | 8,28 UNKNOWN   |
| 8   | Noreña | FOCAL                   | POS | +                | Infected     | 0,87      | 25,75        | 1,16       | 143,53      | 116,43      | NEG                           | 4,47      | NEG         | NEG           | NEG             | NEG          | 5,42 UNKNOWN   |
| 9   | Noreña | FOCAL                   | NEG |                  | Infected     | 0,26      | 11,98        | 0,75       | 124,83      | 109,87      | NEG                           | 1,35      | NEG         | NEG           | NEG             | NEG          | 2,5 UNKNOWN    |
| 10  | Noreña | FOCAL                   | NEG |                  | Infected     | 0,59      | 21,19        | 4,40       | 97,02       | 200,08      | NEG                           | 15,25     | NEG         | NEG           | NEG             | NEG          | 5,37 UNKNOWN   |
| 11  | Noreña | FOCAL                   | NEG |                  | Infected     | 0,51      | 32,43        | 11,09      | 17,04       | 97,22       | NEG                           | 10,61     | NEG         | NEG           | NEG             | NEG          | 8,71 UNKNOWN   |
| 12  | Noreña | FOCAL                   | POS | +                | Infected     | 0,74      | 11,31        | 1,91       | 52,65       | 135,68      | NEG                           | 9,32      | NEG         | NEG           | NEG             | NEG          | 2,61 UNKNOWN   |
| 14  | Noreña | FOCAL                   | NEG |                  | Infected     | 1,07      | 63,82        | 5,37       | 221,92      | 1254,76     | NEG                           | 16,16     | NEG         | NEG           | NEG             | NEG          | 5,42 UNKNOWN   |
| 15  | Noreña | FOCAL                   | POS | +                | Infected     | 0,29      | 54,77        | 2,31       | 127,11      | 15,43       | NEG                           | 33,24     | NEG         | NEG           | NEG             | NEG          | 5,93 UNKNOWN   |
| 16  | Noreña | FOCAL                   | POS | +                | Infected     | 1,11      | 51,22        | 3,36       | 121,03      | 2,71        | NEG                           | 9,97      | NEG         | NEG           | NEG             | NEG          | 6,14 UNKNOWN   |
| 17  | Noreña | FOCAL                   | POS | +                | Infected     | 0,34      | 41,82        | 9,53       | 36,94       | 1094,86     | NEG                           | 5,39      | NEG         | NEG           | NEG             | NEG          | 12,66 UNKNOWN  |
| 18  | Noreña | FOCAL                   | NEG |                  | Infected     | 0,19      | 42,11        | 5,67       | 41,50       | 238,17      | NEG                           | 9,86      | NEG         | NEG           | NEG             | NEG          | 3,67 UNKNOWN   |
| 19  | Noreña | FOCAL                   | POS | +                | Infected     | 0,61      | 43,73        | 3,49       | 518,01      | 881,14      | NEG                           | 6,47      | NEG         | NEG           | NEG             | NEG          | 6,79 UNKNOWN   |
| 20  | Noreña | FOCAL                   | NEG |                  | Infected     | 2,24      | 5,91         | 0,58       | 55,57       | 1258,85     | POS                           | 92,35     | NEG         | NEG           | NEG             | NEG          | 8,1 UNKNOWN    |
| 23  | Noreña | FOCAL                   | NEG |                  | Infected     | 0,20      | 22,74        | 4,06       | 39,47       | 659,23      | NEG                           | 28,39     | NEG         | NEG           | NEG             | NEG          | 7,75 UNKNOWN   |
| 24  | Noreña | FOCAL                   | POS | +                | Infected     | 0,23      | 16,50        | 3,07       | 79,78       | 1102,15     | NEG                           | 0,59      | NEG         | NEG           | NEG             | NEG          | 4,17 UNKNOWN   |
| 26  | Noreña | FOCAL                   | NEG |                  | Infected     | 0,55      | 57,67        | 3,90       | 109,36      | 13,19       | NEG                           | 6,79      | NEG         | POS           | NEG             | POS          | 4,08 UNKNOWN   |
| 28  | Noreña | FOCAL                   | POS | +                | Infected     | 1,57      | 37,21        | 10,38      | 209,50      | 1042,66     | NEG                           | 3,39      | NEG         | POS           | NEG             | NEG          | 7 UNKNOWN      |
| 29  | Noreña | FOCAL                   | POS | +                | Infected     | 1,10      | 52,38        | 2,84       | 151,29      | 322,52      | NEG                           | 3,07      | NEG         | POS           | NEG             | NEG          | 8,44 UNKNOWN   |
| 31  | Noreña | FOCAL                   | POS | +                | Infected     | 0,25      | 9,27         | 0,52       | 43,27       | 1325,44     | NEG                           | 11,80     | NEG         | NEG           | NEG             | NEG          | 5,42 UNKNOWN   |
| 32  | Noreña | FOCAL                   | POS | +                | Infected     | 0,44      | 11,35        | 3,26       | 59,87       | 1005,29     | NEG                           | 4,15      | POS         | POS           | NEG             | POS          | 6,25 UNKNOWN   |
| 33  | Noreña | FOCAL                   | POS | +                | Infected     | -0,03     | 8,49         | 0,66       | 281,24      | 1608,38     | NEG                           | 1,24      | NEG         | NEG           | NEG             | NEG          | 5,15 UNKNOWN   |
| 34  | Noreña | FOCAL                   | POS | +                | Infected     | 0,13      | 15,92        | 0,64       | 80,28       | 980,47      | NEG                           | 2,75      | POS         | NEG           | POS             | NEG          | 4,5 UNKNOWN    |
| 35  | Noreña | FOCAL                   | POS | +                | Infected     | 0,13      | 12,43        | 2,51       | 155,50      | 1320,81     | NEG                           | 10,02     | NEG         | NEG           | NEG             | NEG          | 4,29 UNKNOWN   |
| 36  | Noreña | FOCAL                   | POS | +                | Infected     | 0,90      | 16,15        | 4,47       | 319,77      | 460,41      | NEG                           | 7,92      | NEG         | POS           | NEG             | POS          | 7,36 UNKNOWN   |
| 1   | SERIDA | FOCAL                   | POS | +                | Infected     | 1,36      | 46,06        | 0,92       | 38,08       | 117,87      | NEG                           | 47,25     | NEG         | NEG           | NEG             | NEG          | 4,1 NO         |
| 2   | SERIDA | FOCAL                   | POS | +                | Infected     | 0,23      | 56,24        | 3,13       | 156,08      | 273,15      | NEG                           | 3,57      | NEG         | NEG           | NEG             | NEG          | 5,04 NO        |
| 1   | Soto   | FOCAL                   | NEG |                  | Infected     | 0,98      | 24,24        | 5,25       | 338,27      | 212,85      | NEG                           | 3,27      | NEG         | NEG           | NEG             | NEG          | 8,21 NO        |
| 7   | Soto   | FOCAL                   | POS | +                | Infected     | 1,86      | 14,78        |            | 17,62       | 1071,64     | NEG                           | 0,61      | NEG         | UNDETERMINED  | NEG             | UNDETERMINED | 6,95 NO        |
| 8   | Soto   | FOCAL                   | POS | +                | Infected     | 0,69      | 20,95        | 5,60       | 12,98       | 507,42      | NEG                           | 2,65      | NEG         | POS           | NEG             | POS          | 4,71 NO        |
| 13  | Soto   | FOCAL                   | NEG |                  | Infected     | 3,00      | 14,06        | 5,77       | 88,27       | 190,47      | NEG                           | 2,33      | NEG         | NEG           | NEG             | NEG          | 5,69 NO        |
| 17  | Soto   | FOCAL                   | NEG |                  | Infected     | 1,49      | 24,08        | 21,96      | 33,64       | 121,31      | NEG                           | 5,27      | NEG         | NEG           | NEG             | NEG          | 5,38 NO        |
| 18  | soto   | FOCAL                   | NEG |                  | Infected     | 1,04      | 34,60        | 18,36      | 33,31       | 156,97      | NEG                           | 1,71      | NEG         | NEG           | NEG             | NEG          | 6,94 NO        |
| 19  | Soto   | FOCAL                   | NEG |                  | Infected     | 3,93      | 71,82        | 22,77      | 177,88      | 1152,72     | NEG                           | 9,17      | NEG         | POS           | NEG             | NEG          | 6,19 NO        |
| 25  | Soto   | FOCAL                   | NEG |                  | Infected     | 0,40      | 5,23         | 0,79       | 56,96       | 6381,00     | NEG                           | 1,40      | NEG         | UNDETERMINED  | NEG             | UNDETERMINED | 5,99 NO        |
| 28  | Soto   | FOCAL                   | NEG |                  | Infected     | 7,70      | 53,90        | 12,58      | 196,39      | 828,81      | NEG                           | 0,81      | POS         | POS           | NEG             | POS          | 8,39 NO        |
| 31  | Soto   | FOCAL                   | NEG |                  | Infected     | 0,16      | 78,97        | 7,04       | 18,05       | 868,24      | NEG                           | 5,51      | NEG         | POS           | NEG             | NEG          | 5,33 NO        |
| 36  | Soto   | FOCAL                   | POS | +                | Infected     | 0,25      | 26,14        | 1,90       | 89,28       | 32,04       | NEG                           | 11,72     | NEG         | NEG           | NEG             | NEG          | 8,17 NO        |
| 38  | Soto   | FOCAL                   | NEG |                  | Infected     | 2,11      | 16,75        | 7,04       | 540,06      | 1095,48     | NEG                           | 28,63     | NEG         | NEG           | NEG             | NEG          | 8,89 NO        |
| 41  | Soto   | FOCAL                   | NEG |                  | Infected     | 1,61      | 29,48        | 14,98      | 75,85       | 245,65      | NEG                           | 1,03      | NEG         | POS           | NEG             | POS          | 7,15 NO        |
| 43  | Soto   | FOCAL                   | NEG |                  | Infected     | 0,77      | 37,90        | 16,32      | 55,82       | 315,21      | NEG                           | 3,50      | NEG         | NEG           | NEG             | NEG          | 4,14 NO        |
| 44  | Soto   | FOCAL                   | NEG |                  | Infected     | 3,17      | 24,70        | 1,07       | 41,25       | 382,45      | NEG                           | 6,20      | NEG         | NEG           | NEG             | POS          | 5,45 NO        |
| 51  | Soto   | FOCAL                   | NEG |                  | Infected     | 0,44      | 13,40        |            | 13,88       | 292,29      | NEG                           | 2,79      | NEG         | POS           | NEG             | NEG          | 9,48 NO        |
| 52  | Soto   | FOCAL                   | NEG |                  | Infected     | 1,92      | 30,13        | 22,55      | 192,46      | 825,13      | POS                           | 133,17    | POS         | POS           | NEG             | POS          | 6,59 NO        |
| 53  | Soto   | FOCAL                   | NEG |                  | Infected     | 0,42      | 10,82        | 3,82       | 214,57      | 3823,02     | NEG                           | 0,74      | NEG         | POS           | NEG             | NEG          | 6,82 NO        |
| 70  | Soto   | FOCAL                   | POS | +                | Infected     | 0,45      | 23,10        | 8,06       | 23,76       | 645,92      | NEG                           | 3,83      | NEG         | NEG           | NEG             | NEG          | 4,35 NO        |
| 78  | Soto   | FOCAL                   | POS | +                | Infected     | 0,38      | 26,54        | 0,70       | 90,93       | 291,55      | NEG                           | 1,09      | NEG         | NEG           | NEG             | POS          | 4,39 NO        |
| 106 | Soto   | FOCAL                   | NEG |                  | Infected     | 0,08      | 12,91        | 52,64      | 118,94      |             | NEG                           | 2,71      | NEG         | POS           | NEG             | POS          | 2,72 NO        |
| 112 | Soto   | FOCAL                   | NEG |                  | Infected     | 0,18      | 31,20        | 5,64       | 93,34       | 153,43      | NEG                           | 37,16     | NEG         | NEG           | NEG             | POS          | 2,97 NO        |
| 114 | Soto   | FOCAL                   | NEG |                  | Infected     | 0,38      | 78,39        | 24,21      | 43,91       | 189,02      | NEG                           | 3,77      | POS         | POS           | POS             | POS          | 2,6 NO         |
| 118 | Soto   | FOCAL                   | POS | +                | Infected     | 0,37      | 24,38        | 0,50       | 16,28       | 174,60      | NEG                           | 1,29      | NEG         | NEG           | NEG             | NEG          | 3,74 NO        |
| 143 | Soto   | FOCAL                   | NEG |                  | Infected     | 0,72      | 37,25        | 4,88       | 58,48       | 1,76        | NEG                           | 2,42      | NEG         | NEG           | NEG             | POS          | 1,26 NO        |
| 160 | Soto   | FOCAL                   | POS | +                | Infected     | 6,60      | 13,26        | 1,74       | 37,57       | 254,13      | NEG                           | 2,37      | NEG         | NEG           | NEG             | POS          | 2,12 NO        |
| 6   | Noreña | MULTIFOCAL              | POS | +                | Infected     | 0,41      | 18,59        | 1,39       | 51,23       | 942,04      | NEG                           | 6,57      | NEG         | NEG           | NEG             | POS          | 6,58 UNKNOWN   |
| 22  | Noreña | MULTIFOCAL              | POS | +                | Infected     | 8,91      | 18,27        | 1,76       | 160,32      | 18005,52    | POS                           | 68,86     | NEG         | NEG           | NEG             | NEG          | 5,34 UNKNOWN   |
| 27  | Noreña | MULTIFOCAL              | POS | +                | Infected     | 3,04      | 35,52        | 3,69       | 118,76      | 513,94      | POS                           | 148,65    | POS         | NEG           | NEG             | NEG          | 5,65 UNKNOWN   |
| 30  | Noreña | MULTIFOCAL              | POS | +                | Infected     | 0,87      | 24,81        | 1,65       | 204,43      | 1267,13     | NEG                           | 3,34      | NEG         | NEG           | NEG             | NEG          | 5,58 UNKNOWN   |

| ID  | FARM   | HISTOPATHOLOGICAL GROUP | ZN      | INFECTION STATUS | ELISA FAM84A | ELISA DES | ELISA ABCA13 | ELISA MMP8 | ELISA SPARC | ELISA IDEXX | ELISA IDEXX (numerical value) | PCR FECES | PCR TISSUES | CULTURE FECES | CULTURE TISSUES | AGE (YEARS) | CLINICAL SIGNS |
|-----|--------|-------------------------|---------|------------------|--------------|-----------|--------------|------------|-------------|-------------|-------------------------------|-----------|-------------|---------------|-----------------|-------------|----------------|
| 6   | Soto   | MULTIFOCAL              | POS +   | Infected         | 0,244        | 61,382    | 1,09         | 94,86      | 109,84      | NEG         | 3,239                         | NEG       | NEG         | NEG           | NEG             | 6,63        | NO             |
| 11  | Soto   | MULTIFOCAL              | POS +   | Infected         | 0,40         | 11,62     | 0,56         | 59,87      | 948,75      | NEG         | 1,50                          | NEG       | NEG         | NEG           | POS             | 7,31        | NO             |
| 46  | Soto   | MULTIFOCAL              | POS +   | Infected         | 0,71         | 4,60      | 1,17         | 70,86      | 200,58      | NEG         | 2,98                          | NEG       | NEG         | NEG           | NEG             | 2,75        | SI             |
| 47  | Soto   | MULTIFOCAL              | POS ++  | Infected         | 0,14         | 4,47      | 0,97         | 33,17      | 252,41      | POS         | 67,58                         | POS       | POS         | POS           | POS             | 5,51        | NO             |
| 48  | Soto   | MULTIFOCAL              | POS +   | Infected         | 1,39         | 36,80     | 2,33         | 28,35      | 892,33      | NEG         | 4,82                          | NEG       | NEG         | NEG           | POS             | 9,67        | NO             |
| 54  | Soto   | MULTIFOCAL              | POS +   | Infected         | 1,186        | 52,404    | 0,6          | 53,92      | 1163,56     | NEG         | 12,56                         | NEG       | POS         | POS           | NEG             | 6,14        | NO             |
| 63  | Soto   | MULTIFOCAL              | POS +   | Infected         | 1,25         | 25,50     | 2,26         | 243,72     | 50,40       | NEG         | 7,60                          | NEG       | NEG         | NEG           | NEG             | 6,42        | SI             |
| 64  | Soto   | MULTIFOCAL              | POS +   | Infected         | 1,65         | 43,61     | 0,37         | 50,33      | 354,94      | POS         | 186,89                        | POS       | POS         | POS           | POS             | 3,62        | NO             |
| 65  | Soto   | MULTIFOCAL              | POS +   | Infected         | 0,10         | 10,38     | 0,45         | 29,59      | 1351,29     | NEG         | 3,46                          | NEG       | POS         | NEG           | NEG             | 7,7         | NO             |
| 76  | Soto   | MULTIFOCAL              | POS +   | Infected         | 0,87         | 16,83     |              | 18,17      | 1724,50     | NEG         | 4,86                          | NEG       | POS         | NEG           | NEG             | 5,72        | NO             |
| 93  | Soto   | MULTIFOCAL              | POS +   | Infected         | 1,09         | 37,36     | 1,09         | 26,92      | 1234,00     | NEG         | 2,12                          | NEG       | NEG         | NEG           | NEG             | 4,76        | NO             |
| 97  | Soto   | MULTIFOCAL              | POS ++  | Infected         | 0,07         | 33,51     | 6            | 42,48      | 165,74      | POS         | 131,05                        | POS       | POS         | NEG           | POS             | 2,96        | SI             |
| 110 | Soto   | MULTIFOCAL              | NEG     | Infected         | 0,48         | 23,93     | 4,37         | 53,25      | 524,74      | NEG         | 2,96                          | NEG       | POS         | NEG           | POS             | 4,03        | NO             |
| 146 | Soto   | MULTIFOCAL              | POS +   | Infected         | 0,265        | 28,804    | 0,70         | 39,47      | 116,10      | NEG         | 3,407                         | POS       | NEG         | POS           | POS             | 2,57        | NO             |
| 25  | Noreña | DIFUSSE INTERMEDIATE    | POS ++  | Infected         | 2,70         | 22,88     | 1,41         | 266,79     | 175,69      | POS         | 137,07                        | POS       | POS         | NEG           | POS             | 8,44        | UNKNOWN        |
| 3   | SERIDA | DIFUSSE INTERMEDIATE    | POS ++  | Infected         | 3,27         | 59,25     | 1,22         | 224,78     | 196,55      | NEG         | 4,58                          | NEG       | NEG         | NEG           | NEG             | 4,85        | NO             |
| 4   | SERIDA | DIFUSSE INTERMEDIATE    | POS ++  | Infected         | 1,17         | 73,31     | 3,59         | 59,37      | 216,11      | NEG         | 41,55                         | NEG       | NEG         | NEG           | NEG             | 2,15        | NO             |
| 5   | Soto   | DIFUSSE INTERMEDIATE    | POS ++  | Infected         | 1,06         | 23,85     | 1,20         | 98,90      | 40,61       | POS         | 205,94                        | POS       | NEG         | POS           | POS             | 5,22        | SI             |
| 26  | Soto   | DIFUSSE INTERMEDIATE    | POS +   | Infected         | 0,28         | 5,25      | 6,89         | 73,10      | 903,81      | POS         | 187,69                        | POS       | POS         | NEG           | POS             | 5,46        | NO             |
| 27  | Soto   | DIFUSSE PAUCIBACILLARY  | POS +   | Infected         | 1,79         | 6,37      | 2,75         | 60,20      | 92,95       | POS         | 283,13                        | POS       | POS         | NEG           | POS             | 3,44        | NO             |
| 30  | Soto   | DIFUSSE INTERMEDIATE    | POS +   | Infected         | 0,49         | 70,83     | 10,02        | 42,59      | 174,99      | NEG         | 2,71                          | NEG       | NEG         | NEG           | NEG             | 4,14        | SI             |
| 32  | Soto   | DIFUSSE INTERMEDIATE    | POS +   | Infected         | 2,55         | 8,29      | 2,53         | 293,91     | 359,49      | POS         | 241,18                        | POS       | POS         | POS           | POS             | 4,47        | SI             |
| 49  | Soto   | DIFUSSE MULTIBACILAR    | POS +   | Infected         | 2,47         | 36,59     | 4,06         | 85,33      | 98,97       | POS         | 94,49                         | POS       | POS         | POS           | POS             | 4,45        | SI             |
| 59  | Soto   | DIFUSSE INTERMEDIATE    | POS ++  | Infected         | 1,50         | 50,79     | 5,74         | 716,50     | 7,73        | POS         | 288,75                        | POS       | POS         | NEG           | POS             | 7,02        | SI             |
| 68  | Soto   | DIFUSSE INTERMEDIATE    | POS ++  | Infected         | 2,33         | 5,70      | 2,56         | 63,79      | 70,75       | POS         | 254,72                        | POS       | POS         | POS           | POS             | 6,01        | SI             |
| 87  | Soto   | DIFUSSE INTERMEDIATE    | POS ++  | Infected         | 0,21         | 66,80     | 1,29         | 96,93      | 156,32      | POS         | 113,49                        | POS       | POS         | NEG           | NEG             | 5,09        | SI             |
| 88  | Soto   | DIFUSSE MULTIBACILAR    | POS +++ | Infected         | 1,12         | 15,58     | 1,26         | 116,06     | 124,70      | POS         | 286,51                        | POS       | POS         | NEG           | POS             | 2,92        | SI             |
| 99  | Soto   | DIFUSSE MULTIBACILAR    | POS +++ | Infected         | 0,34         | 60,20     | 0,58         | 66,60      | 112,74      | POS         | 157,83                        | POS       | POS         | POS           | POS             | 4,82        | SI             |
| 122 | Soto   | DIFUSSE INTERMEDIATE    | POS ++  | Infected         | 0,10         | 29,54     | 0,63         | 40,23      | 203,77      | NEG         | 19,60                         | NEG       | NEG         | NEG           | NEG             | 6,19        | NO             |
| 12  | Soto   | NO LESIONS              | NEG     | Not infected     | 0,22         | 7,68      | 5,98         | 17,69      | 145,08      | NEG         | 1,72                          | NEG       | NEG         | NEG           | NEG             | 3,58        | NO             |
| 80  | Soto   | NO LESIONS              | NEG     | Not infected     | 1,12         | 55,68     | 9,58         | 111,24     | 88,75       | NEG         | 8,54                          | NEG       | NEG         | NEG           | NEG             | 2,86        | NO             |
| 94  | Soto   | NO LESIONS              | NEG     | Not infected     | 2,34         | 24,62     | 10,65        | 64,13      | 114,32      | NEG         | 1,26                          | NEG       | NEG         | NEG           | NEG             | 2,7         | NO             |
| 113 | Soto   | NO LESIONS              | NEG     | Not infected     | 0,32         | 5,99      | 0,43         | 97,00      | 8,98        | NEG         | 2,45                          | NEG       | NEG         | NEG           | NEG             | 1,27        | NO             |
| 4   | Noreña | NO LESIONS              | NEG     | Not infected     | 3,12         | 21,04     | 2,09         | 242,20     | 1477,86     | NEG         | 5,44                          | NEG       | NEG         | NEG           | NEG             | 3,26        | UNKNOWN        |
| 13  | Noreña | NO LESIONS              | NEG     | Not infected     | 9,49         | 21,18     | 1,34         | 158,69     | 661,62      | NEG         | 8,84                          | NEG       | NEG         | NEG           | NEG             | 0,81        | UNKNOWN        |
| 1   | Flor   | PTB-FREE FARM           |         | Not infected     | 0,08         | 11,66     | 0,57         | 67,38      | 216,31      | NEG         | 3,23                          | NEG       |             | NEG           |                 | 4,50        | NO             |
| 2   | Flor   | PTB-FREE FARM           |         | Not infected     | 0,54         | 27,42     | 1,47         | 499,75     | 219,25      | NEG         | 9,22                          | NEG       |             | NEG           |                 | 7,58        | NO             |
| 3   | Flor   | PTB-FREE FARM           |         | Not infected     | 0,96         | 14,78     | 0,86         | 12,96      | 228,19      | NEG         | 1,32                          | NEG       |             | NEG           |                 | 3,25        | NO             |
| 4   | Flor   | PTB-FREE FARM           |         | Not infected     | 1,20         | 29,50     | 1,96         | 12,23      | 165,46      | NEG         | 5,47                          | NEG       |             | NEG           |                 | 3,50        | NO             |
| 5   | Flor   | PTB-FREE FARM           |         | Not infected     | 0,80         | 24,68     | 0,79         | 16,02      | 174,64      | NEG         | 1,84                          | NEG       |             | NEG           |                 | 3,83        | NO             |
| 6   | Flor   | PTB-FREE FARM           |         | Not infected     | 1,03         | 17,43     | 0,79         | 16,75      | 374,14      | NEG         | 0,56                          | NEG       |             | NEG           |                 | 3,67        | NO             |
| 7   | Flor   | PTB-FREE FARM           |         | Not infected     | 0,26         | 24,22     | 0,83         | 15,53      | 156,84      | NEG         | 4,35                          | NEG       |             | NEG           |                 | 4,25        | NO             |
| 8   | Flor   | PTB-FREE FARM           |         | Not infected     | 0,46         | 20,37     | 0,93         | 19,10      | 260,91      | NEG         | 4,35                          | NEG       |             | NEG           |                 | 3,92        | NO             |
| 9   | Flor   | PTB-FREE FARM           |         | Not infected     | 0,83         | 20,14     | 0,71         | 38,69      | 260,13      | NEG         | 11,14                         | NEG       |             | NEG           |                 | 10,08       | NO             |
| 10  | Flor   | PTB-FREE FARM           |         | Not infected     | 6,14         | 25,19     | 0,92         | 27,38      | 180,86      | NEG         | 3,31                          | NEG       |             | NEG           |                 | 9,75        | NO             |
| 11  | Flor   | PTB-FREE FARM           |         | Not infected     | 0,19         | 17,18     | 0,69         | 188,34     | 227,51      | NEG         | 0,20                          | NEG       |             | NEG           |                 | 3,92        | NO             |
| 12  | Flor   | PTB-FREE FARM           |         | Not infected     | 0,70         | 9,83      | 0,56         | 78,43      | 222,34      | NEG         | 3,95                          | NEG       |             | NEG           |                 | 5,75        | NO             |
| 13  | Flor   | PTB-FREE FARM           |         | Not infected     | 0,38         | 8,63      | 0,51         | 50,95      | 327,47      | NEG         | 20,28                         | NEG       |             | NEG           |                 | 5,67        | NO             |
| 14  | Flor   | PTB-FREE FARM           |         | Not infected     | 0,22         | 17,42     | 0,58         | 10,89      | 132,46      | NEG         | 4,31                          | NEG       |             | NEG           |                 | 3,25        | NO             |
| 15  | Flor   | PTB-FREE FARM           |         | Not infected     | 0,30         | 25,33     | 0,83         | 36,90      | 295,09      | NEG         | 9,70                          | NEG       |             | NEG           |                 | 4,67        | NO             |
| 16  | Flor   | PTB-FREE FARM           |         | Not infected     | 0,36         | 13,31     | 0,57         | 9,91       | 107,56      | NEG         | 2,79                          | NEG       |             | NEG           |                 | 3,83        | NO             |
| 17  | Flor   | PTB-FREE FARM           |         | Not infected     | 0,40         | 58,42     | 1,28         | 17,36      | 153,81      | NEG         | 13,85                         | NEG       |             | NEG           |                 | 4,83        | NO             |
| 18  | Flor   | PTB-FREE FARM           |         | Not infected     | 0,25         | 18,41     | 0,58         | 25,67      | 342,66      | NEG         | 2,79                          | NEG       |             | NEG           |                 | 6,42        | NO             |
| 19  | Flor   | PTB-FREE FARM           |         | Not infected     | 1,82         | 18,66     | 0,59         | 12,84      | 401,25      | NEG         | 3,31                          | NEG       |             | NEG           |                 | 3,25        | NO             |
| 20  | Flor   | PTB-FREE FARM           |         | Not infected     | 0,37         | 9,60      | 0,62         | 47,16      | 149,61      | NEG         | 7,27                          | NEG       |             | NEG           |                 | 3,58        | NO             |
| 21  | Flor   | PTB-FREE FARM           |         | Not infected     | 1,01         | 12,65     | 0,88         | 29,82      | 126,38      | NEG         | 12,65                         | NEG       |             | NEG           |                 | 4,67        | NO             |
| 22  | Flor   | PTB-FREE FARM           |         | Not infected     | 0,47         | 31,14     | 0,86         | 10,64      | 149,61      | NEG         | 4,43                          | NEG       |             | NEG           |                 | 7,00        | NO             |
| 23  | Flor   | PTB-FREE FARM           |         | Not infected     | 0,20         | 10,40     | 0,54         | 12,35      | 145,89      | NEG         | 16,41                         | NEG       |             | NEG           |                 | 9,08        | NO             |

| ID | FARM | HISTOPATHOLOGICAL GROUP | ZN | INFECTION STATUS | ELISA FAM84A | ELISA DES | ELISA ABCA13 | ELISA MMP8 | ELISA SPARC | ELISA IDEXX | ELISA IDEXX (numerical value) | PCR FECES | PCR TISSUES | CULTURE FECES | CULTURE TISSUES | AGE (YEARS) | CLINICAL SIGNS |
|----|------|-------------------------|----|------------------|--------------|-----------|--------------|------------|-------------|-------------|-------------------------------|-----------|-------------|---------------|-----------------|-------------|----------------|
| 24 | Flor | PTB-FREE FARM           |    | Not infected     | 2,44         | 22,90     | 0,81         | 39,95      | 736,30      | NEG         | 6,87                          | NEG       |             | NEG           |                 | 4,50        | NO             |
| 25 | Flor | PTB-FREE FARM           |    | Not infected     | 0,28         | 17,46     | 0,68         | 16,38      | 101,08      | NEG         | 20,76                         | NEG       |             | NEG           |                 | 4,50        | NO             |
| 26 | Flor | PTB-FREE FARM           |    | Not infected     | 0,18         | 30,27     | 0,56         | 30,89      | 252,21      | NEG         | 10,14                         | NEG       |             | NEG           |                 | 4,33        | NO             |
| 27 | Flor | PTB-FREE FARM           |    | Not infected     | 7,64         | 22,76     | 0,74         | 38,73      | 248,64      | NEG         | -0,32                         | NEG       |             | NEG           |                 | 4,17        | NO             |
| 28 | Flor | PTB-FREE FARM           |    | Not infected     | 1,12         | 15,21     | 1,11         | 110,91     | 239,22      | NEG         | 14,89                         | NEG       |             | NEG           |                 | 3,08        | NO             |
| 29 | Flor | PTB-FREE FARM           |    | Not infected     | 0,86         | 19,47     | 0,66         | 11,13      | 114,46      | NEG         | 1,12                          | NEG       |             | NEG           |                 | 9,86        | NO             |
| 30 | Flor | PTB-FREE FARM           |    | Not infected     | 0,78         | 18,70     | 0,76         | 495,65     | 3,38        | NEG         | 9,78                          | NEG       |             | NEG           |                 | 2,58        | NO             |
| 31 | Flor | PTB-FREE FARM           |    | Not infected     | 2,12         | 38,75     | 1,22         | 143,03     | 32,87       | NEG         | 10,34                         | NEG       |             | NEG           |                 | 2,25        | NO             |
| 32 | Flor | PTB-FREE FARM           |    | Not infected     | 0,33         | 45,94     | 1,17         | 68,04      | 1,33        | NEG         | 7,62                          | NEG       |             | NEG           |                 | 2,83        | NO             |
| 33 | Flor | PTB-FREE FARM           |    | Not infected     | 0,26         | 17,32     | 0,59         | 14,06      | 3,67        | NEG         | 13,13                         | NEG       |             | NEG           |                 | 5,25        | NO             |
| 34 | Flor | PTB-FREE FARM           |    | Not infected     | 0,72         | 52,39     | 0,89         | 11,01      | 12,76       | NEG         | 2,55                          | NEG       |             | NEG           |                 | 2,33        | NO             |
| 35 | Flor | PTB-FREE FARM           |    | Not infected     | 2,94         | 42,54     | 0,80         | 89,91      | 1,14        | NEG         | 4,87                          | NEG       |             | NEG           |                 | 2,50        | NO             |
| 36 | Flor | PTB-FREE FARM           |    | Not infected     | 0,26         | 34,05     | 0,83         | 25,42      | 14,69       | NEG         | 5,95                          | NEG       |             | NEG           |                 | 2,25        | NO             |
| 37 | Flor | PTB-FREE FARM           |    | Not infected     | 0,27         | 13,97     | 0,54         | 11,25      | 290,29      | NEG         | 2,12                          | NEG       |             | NEG           |                 | 2,25        | NO             |
| 38 | Flor | PTB-FREE FARM           |    | Not infected     | 0,29         | 46,12     | 1,11         | 13,82      | 2,56        | NEG         | 3,67                          | NEG       |             | NEG           |                 | 4,50        | NO             |
| 39 | Flor | PTB-FREE FARM           |    | Not infected     | 1,30         | 21,33     | 0,54         | 17,73      | 3,35        | NEG         | 4,39                          | NEG       |             | NEG           |                 | 2,58        | NO             |
| 40 | Flor | PTB-FREE FARM           |    | Not infected     | 0,22         | 33,77     | 0,62         | 9,91       | 0,97        | NEG         | 12,77                         | NEG       |             | NEG           |                 | 2,50        | NO             |
| 41 | Flor | PTB-FREE FARM           |    | Not infected     | 0,77         | 22,12     | 0,51         | 14,31      | 231,31      | NEG         | 7,19                          | NEG       |             | NEG           |                 | 6,92        | NO             |
| 42 | Flor | PTB-FREE FARM           |    | Not infected     | 0,75         | 25,61     | 2,20         | 22,00      | 215,45      | NEG         | 5,67                          | NEG       |             | NEG           |                 | 7,25        | NO             |
| 43 | Flor | PTB-FREE FARM           |    | Not infected     | 2,58         | 14,96     | 0,93         | 11,86      | 5,09        | NEG         | 7,54                          | NEG       |             | NEG           |                 | 1,75        | NO             |
| 44 | Flor | PTB-FREE FARM           |    | Not infected     | 3,53         | 12,74     | 0,67         | 78,10      | 108,23      | NEG         | 0,12                          | NEG       |             | NEG           |                 | 0,67        | NO             |
| 45 | Flor | PTB-FREE FARM           |    | Not infected     | 6,42         | 15,70     | 0,97         | 12,91      | 0,94        | NEG         | 0,18                          | NEG       |             | NEG           |                 | 1,25        | NO             |
| 46 | Flor | PTB-FREE FARM           |    | Not infected     | 0,51         | 9,92      | 0,69         | 22,05      | 1,10        | NEG         | 5,97                          | NEG       |             | NEG           |                 | 1,42        | NO             |
| 47 | Flor | PTB-FREE FARM           |    | Not infected     | 1,04         | 14,86     | 0,88         | 21,77      | 0,87        | NEG         | 4,94                          | NEG       |             | NEG           |                 | 1,92        | NO             |
| 48 | Flor | PTB-FREE FARM           |    | Not infected     | 0,59         | 13,23     | 0,53         | 19,83      | 0,88        | NEG         | 5,73                          | NEG       |             | NEG           |                 | 1,50        | NO             |
| 49 | Flor | PTB-FREE FARM           |    | Not infected     | 0,48         | 18,66     | 0,72         | 188,69     | 74,60       | NEG         | 1,15                          | NEG       |             | NEG           |                 | 1,75        | NO             |
| 50 | Flor | PTB-FREE FARM           |    | Not infected     | 0,72         | 17,61     | 0,90         | 27,58      | 77,71       | NEG         | 3,32                          | NEG       |             | NEG           |                 | 1,83        | NO             |
| 51 | Flor | PTB-FREE FARM           |    | Not infected     | 0,51         | 18,87     | 1,10         | 18,31      | 45,13       | NEG         | 6,81                          | NEG       |             | NEG           |                 | 0,50        | NO             |
| 52 | Flor | PTB-FREE FARM           |    | Not infected     | 0,21         | 21,91     | 1,28         | 17,89      | 0,89        | NEG         | 19,11                         | NEG       |             | NEG           |                 | 0,83        | NO             |
| 53 | Flor | PTB-FREE FARM           |    | Not infected     | 8,84         | 18,09     | 1,24         | 36,99      | 0,90        | NEG         | 1,45                          | NEG       |             | NEG           |                 | 1,33        | NO             |
| 54 | Flor | PTB-FREE FARM           |    | Not infected     | 0,98         | 19,18     | 1,14         | 16,65      | 1,30        | NEG         | 1,69                          | NEG       |             | NEG           |                 | 1,50        | NO             |
| 55 | Flor | PTB-FREE FARM           |    | Not infected     | 2,07         | 10,52     | 0,68         | 19,28      | 1,09        | NEG         | 0,30                          | NEG       |             | NEG           |                 | 1,83        | NO             |
| 56 | Flor | PTB-FREE FARM           |    | Not infected     | 1,09         | 7,79      | 0,47         | 25,78      | 1,68        | NEG         | 0,60                          | NEG       |             | NEG           |                 | 0,67        | NO             |
| 57 | Flor | PTB-FREE FARM           |    | Not infected     | 0,32         | 18,41     | 1,00         | 19,14      | 0,91        | NEG         | 1,51                          | NEG       |             | NEG           |                 | 1,33        | NO             |
| 58 | Flor | PTB-FREE FARM           |    | Not infected     | 0,20         | 68,99     | 3,52         | 22,74      | 0,85        | NEG         | 1,57                          | NEG       |             | NEG           |                 | 1,08        | NO             |
| 59 | Flor | PTB-FREE FARM           |    | Not infected     | 0,38         | 13,37     | 1,26         | 16,79      | 0,93        | NEG         | 3,98                          | NEG       |             | NEG           |                 | 0,83        | NO             |
| 60 | Flor | PTB-FREE FARM           |    | Not infected     | 0,34         | 13,52     | 1,10         | 13,88      | 0,89        | NEG         | 14,41                         | NEG       |             | NEG           |                 | 1,25        | NO             |
| 61 | Flor | PTB-FREE FARM           |    | Not infected     | 0,30         | 35,13     | 3,28         | 400,33     | 0,90        | NEG         | 11,28                         | NEG       |             | NEG           |                 | 1,00        | NO             |
